# Supplementary material
Source: Springer Nature journal article supplement (https://www.springermedizin.de/resource/supplementary/12881_2014_1228_MOESM5_ESM.pdf/9452204)
Supplement: MOESM5 [file 9452204]

Table S3. The features of the transcription factor binding sites in the *CHI3L1* promoter region

| Transcription factor and Synonyms |                                                                | Swissprot ID | Entrez Gene: | Binding Site Position in <i>CHI3L1</i> |           | Span size (nt) | Distance from the binding site to the related SNP position |                         |
|-----------------------------------|----------------------------------------------------------------|--------------|--------------|----------------------------------------|-----------|----------------|------------------------------------------------------------|-------------------------|
|                                   |                                                                |              |              |                                        |           |                | rs1538372 <sup>a</sup>                                     | rs10399931 <sup>b</sup> |
| GR                                | Glucocorticoid receptor; <i>NR3C1</i>                          | P04150       | 2908         | 201421115                              | 201421130 | 16             | -40 ~ -25                                                  | -1588~1573              |
| STAT1                             | <i>STAT1</i>                                                   | P42224       | 6772         | 201421078                              | 201421098 | 21             | -77 ~ -57                                                  | -1625~-1605             |
| BRACH                             | Brachyury Protein; <i>T</i>                                    | P20293       | 6862         | 201420975                              | 201420998 | 24             | -180~ -157                                                 | -1728~1705              |
| HTF                               | Hepatocarcinogenesis-related transcription factor; <i>XBPI</i> | Q9R1S4       | 7494         | 201420961                              | 201420984 | 24             | -194~ -171                                                 | -1742~-1719             |
| E4BP4                             | E4 promoter-binding protein 4; <i>NFIL3</i>                    | Q16649       | 4783         | 201422864                              | 201422875 | 12             | +1709~+1720                                                | +161~+172               |
| CREBP1                            | cAMP response element-binding protein CRE-BP1; <i>ATF2</i>     | P15336       | 1386         | 201422866                              | 201422873 | 8              | +1711~ +1718                                               | +163~+170               |

The distance from the transcription factor binding site to the SNP site were related to the SNP (rs1538372 or rs10399931) position and orientation with “+” for up-stream and “-” for down-stream, relating to transcription start site position 201422500. The data were analysed using the UCSC genome browser assembly mapping 2006 (NCBI36/hg18).

a. The SNP rs1538372 position is 201421155.

b. The SNP rs10399931 position is 201422703.
